# Supplementary material for: Porphyrin Co(III)-Nitrene Radical Mediated Pathway for Synthesis of o-Aminoazobenzenes
Source: PubMed Central journal article supplement (PMC6102545; doi:10.3390/molecules23051052), 2018-05-01

Experimental data belonging to the paper

Porphyrin Co(III)-nitrene radical mediated pathway for  
synthesis of *o*-aminoazobenzenes

**Monalisa Goswami<sup>1</sup> and Bas de Bruin<sup>1,\*</sup>**

<sup>1</sup> Homogeneous, Supramolecular and Bio-Inspired Catalysis, Van 't Hoff Institute for Molecular Sciences,  
University of Amsterdam, Amsterdam, the Netherlands

\* Correspondence: [B.deBruin@uva.nl](mailto:B.deBruin@uva.nl)

## X-ray single crystal determination Compound C

$C_{20}H_{28}N_4$  Fw = 324.46, orange plate, 0.80 x 0.29 x 0.08 mm, monoclinic, P 21/c (no. 14),  $a = 11.7911(5)$ ,  $b = 6.7919(3)$ ,  $c = 11.5759(5)$  Å,  $\alpha = 90^\circ$ ,  $\beta = 94.530(2)$ ,  $\gamma = 90^\circ$ ,  $V = 924.15(7)$  Å<sup>3</sup>,  $Z = 2$ ,  $D_x = 1.166$  g cm<sup>-3</sup>,  $\mu = 0.071$  mm<sup>-1</sup>. In total, 7644 reflections were measured on a Bruker D8 Quest Eco diffractometer, equipped with a TRIUMPH monochromator and a CMOS PHOTON 50 detector ( $\lambda = 0.71073$  Å) up to a resolution of  $(\sin \theta/\lambda)_{\max} = 0.84$  Å<sup>-1</sup> at a temperature of 150(2) K. The intensity data were integrated with the Bruker APEX2 software.<sup>1</sup> Absorption correction and scaling was performed with SADABS.<sup>2</sup> (0.82–0.99 correction range). In total, 1615 reflections were unique ( $R_{\text{int}} = 0.110$ ), of which 1280 were observed [ $I > 2\sigma(I)$ ]. The structure was solved with Intrinsic Phasing Methods using SHELXT<sup>3</sup> and refined with SHELXL-2013<sup>4</sup> against  $F^2$  of all reflections. Non-hydrogen atoms were refined with anisotropic displacement parameters. Hydrogen atoms were introduced in calculated positions and refined with a riding model.  $R1/wR2$  [ $I > 2\sigma(I)$ ]: 0.0428/0.1482.  $S = 1.142$ . Residual electron density between -0.192 and 0.168 e Å<sup>-3</sup>. Geometry calculations and checking for higher symmetry was performed with the PLATON program.<sup>5</sup>

<sup>1</sup> Bruker, APEX2 software, Madison, WI, USA, **2014**.

<sup>2</sup> SAINT, version 6.02, and SADABS, version 2.03; Bruker AXS, Inc., Madison, WI, **2002**.

<sup>3</sup> G.M. Sheldrick, SHELXT - Universität Göttingen, Germany, **2012**.

<sup>4</sup> G.M. Sheldrick, *Acta Cryst.* **2015**, A71, 3–8.

<sup>5</sup> A.L. Spek, *Acta Cryst.* **2009**, D65, 148–155.

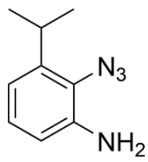

**<sup>1</sup>H- NMR**

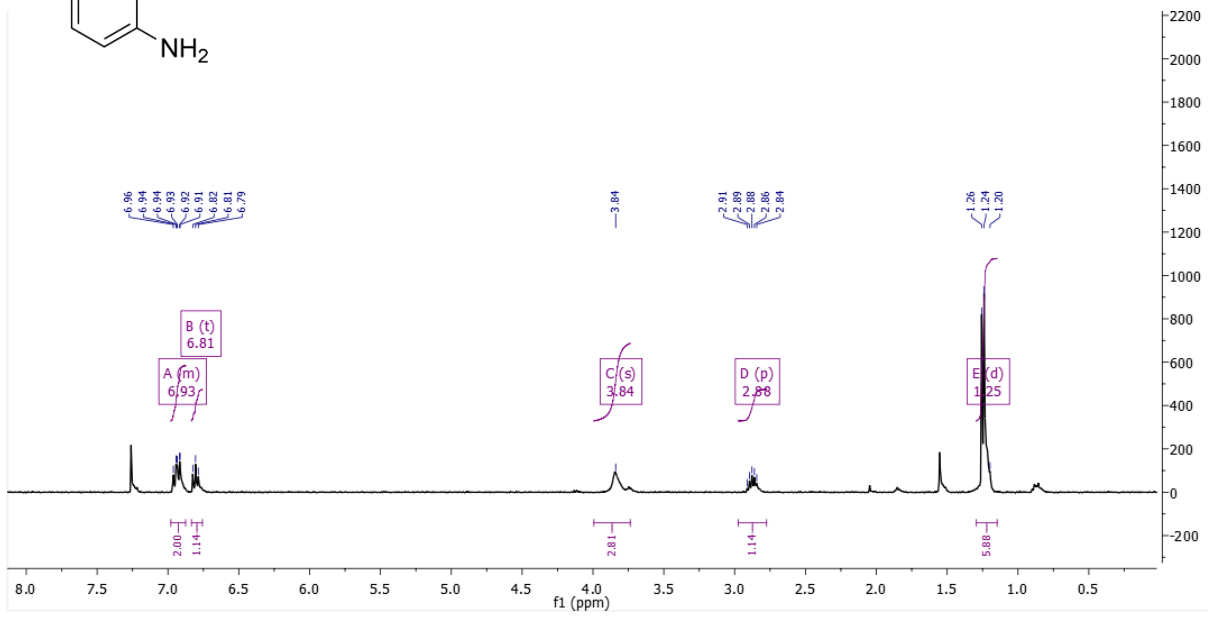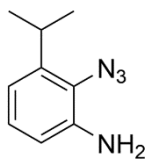

**<sup>13</sup>C- NMR**

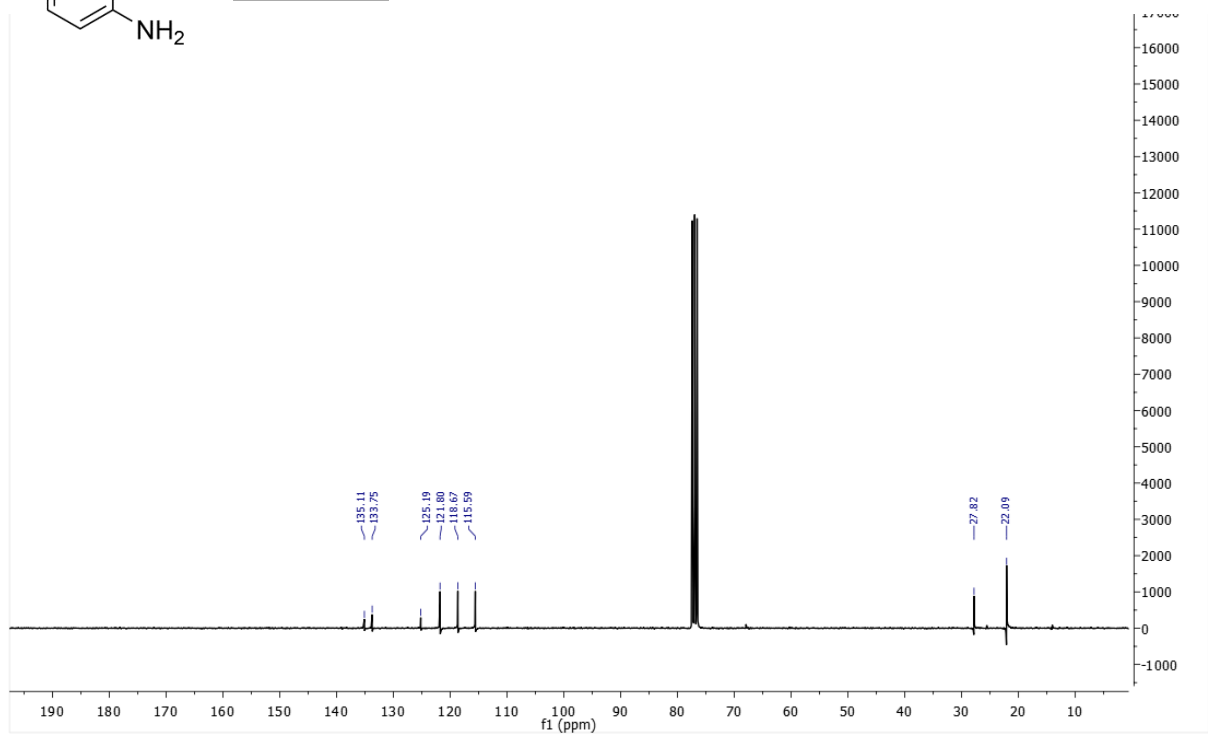

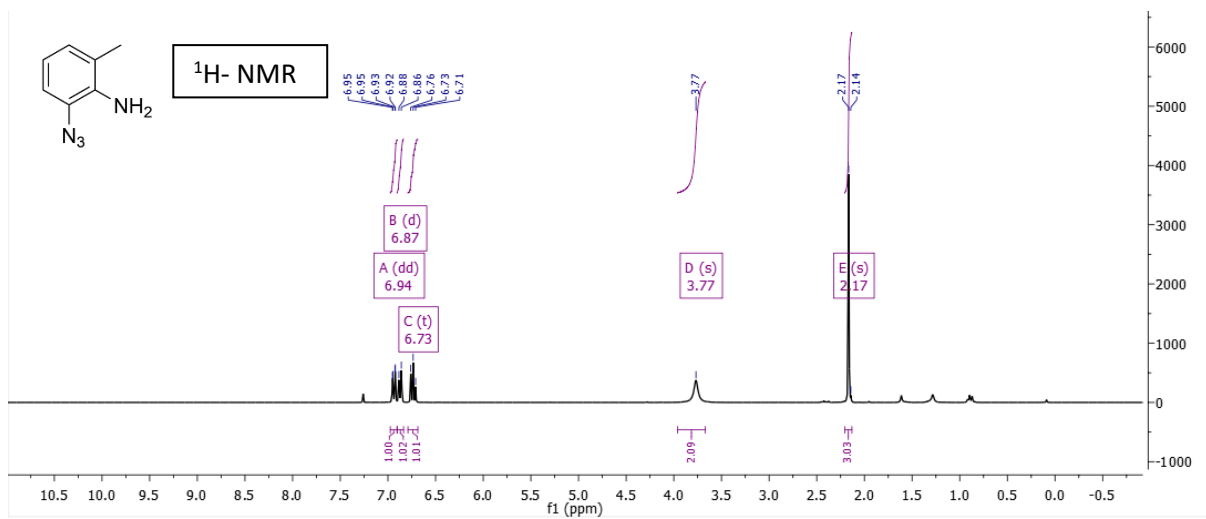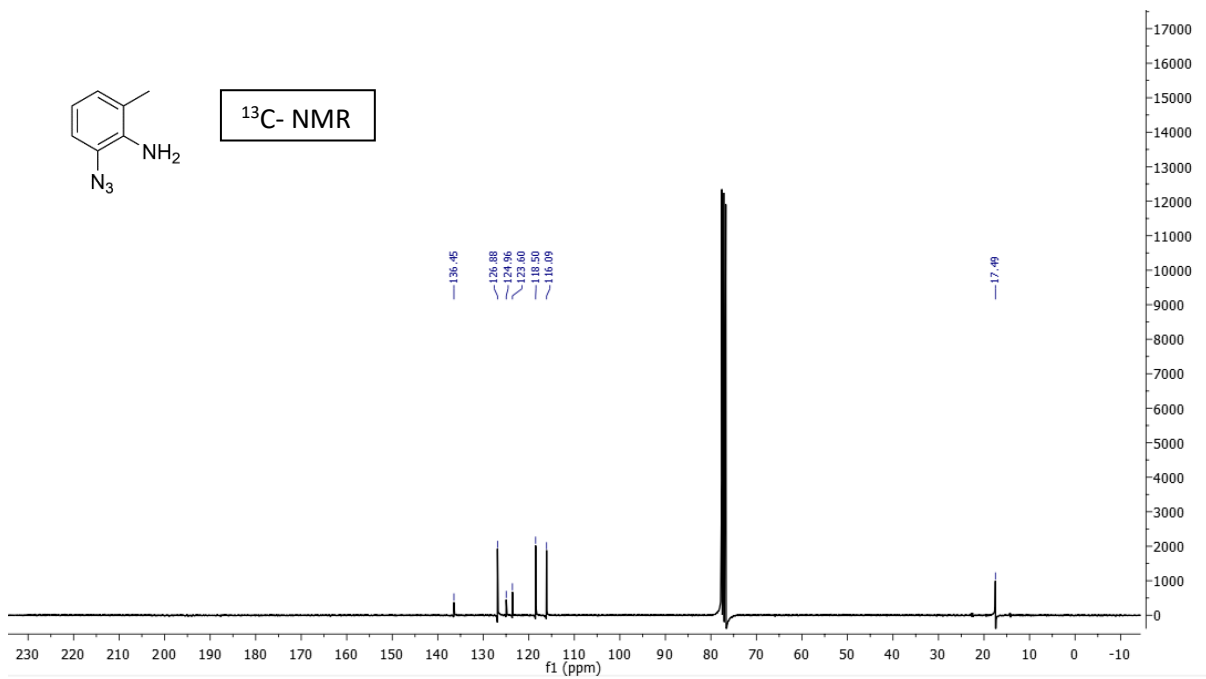

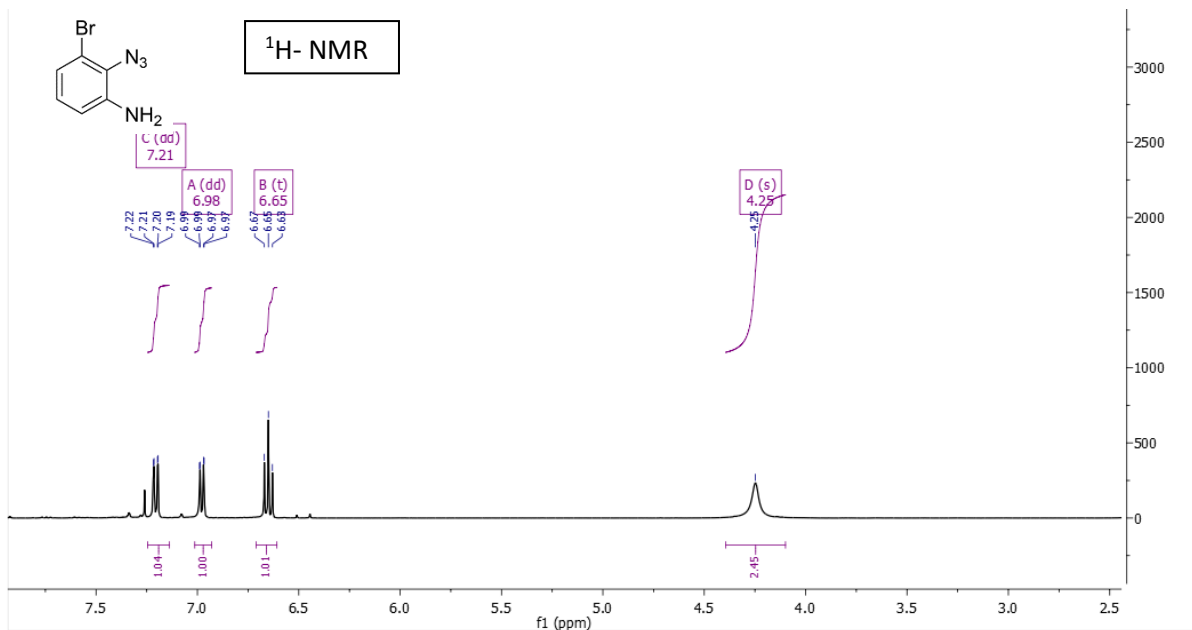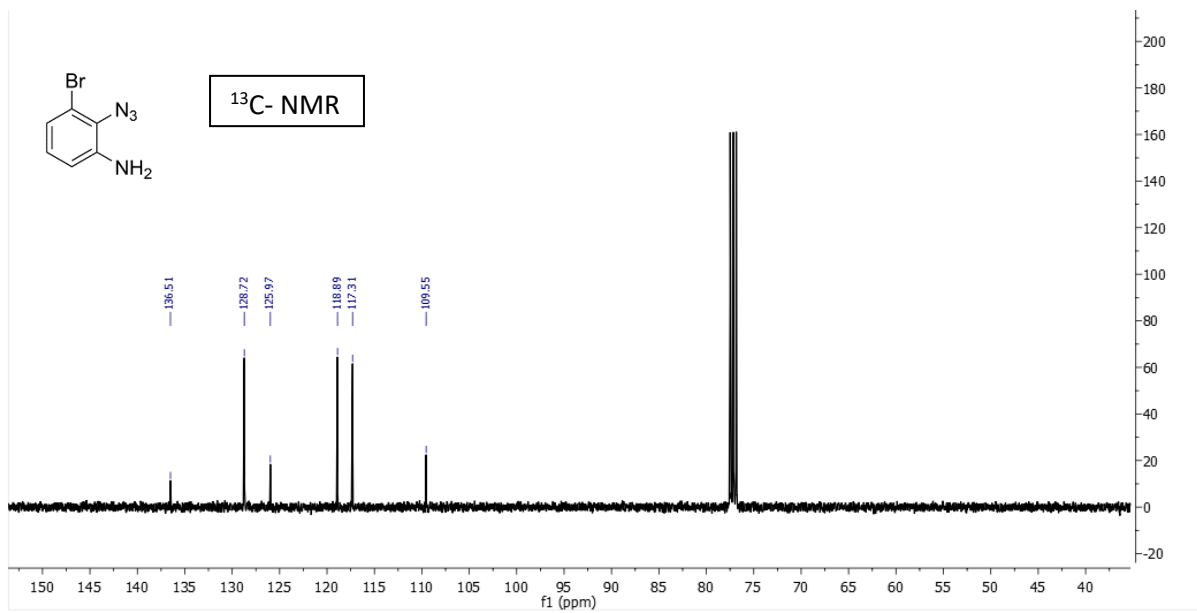

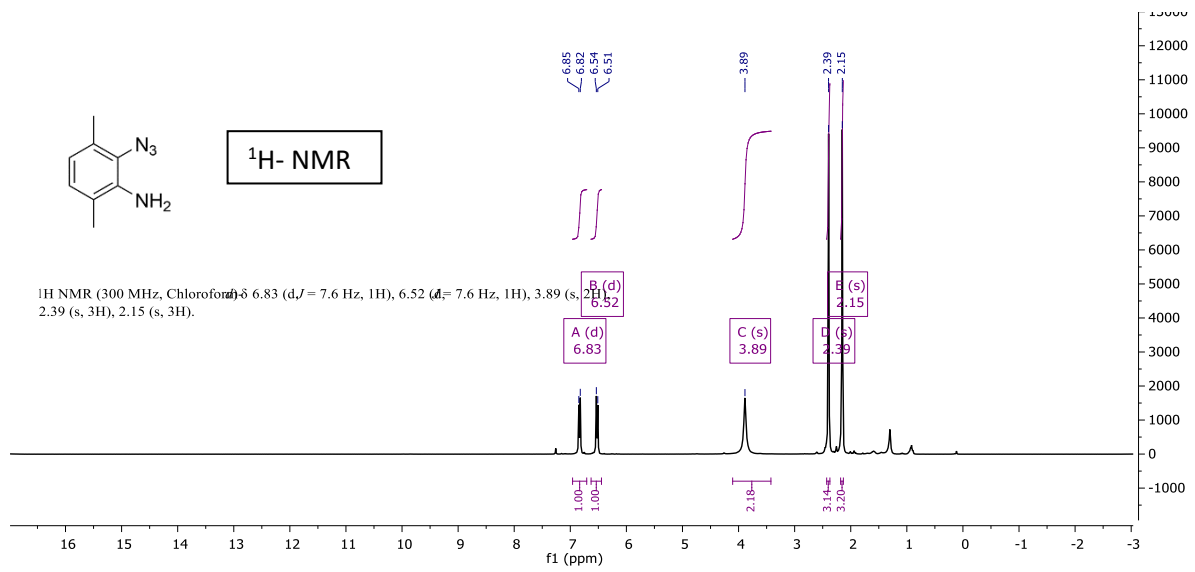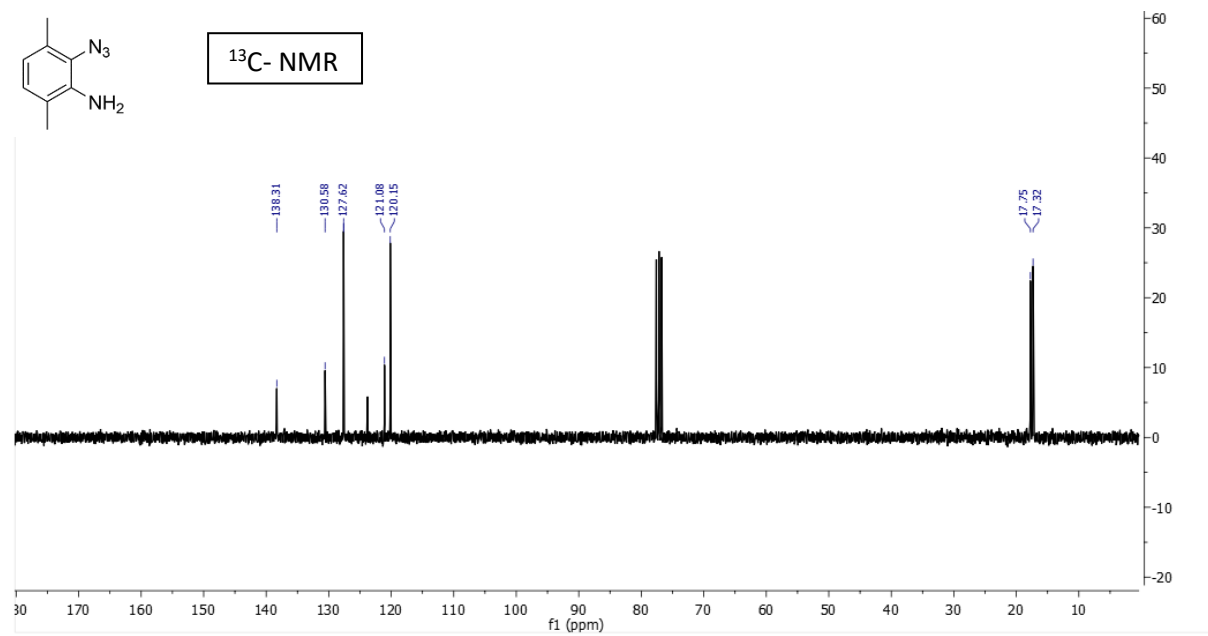

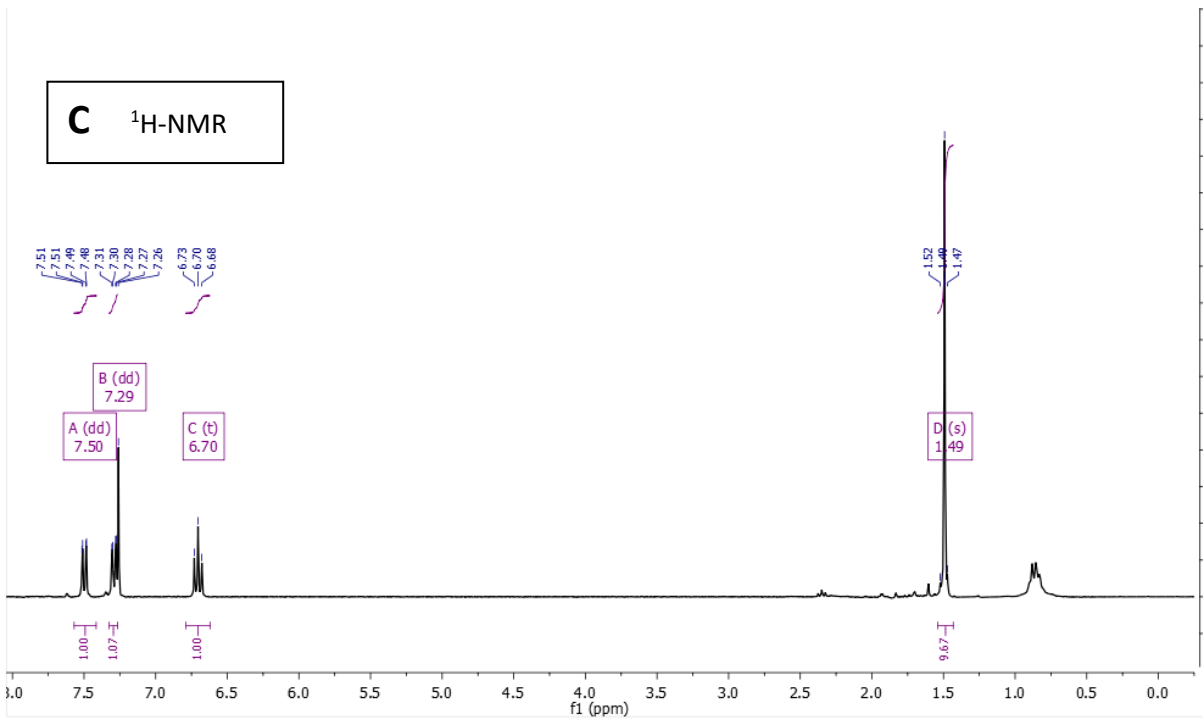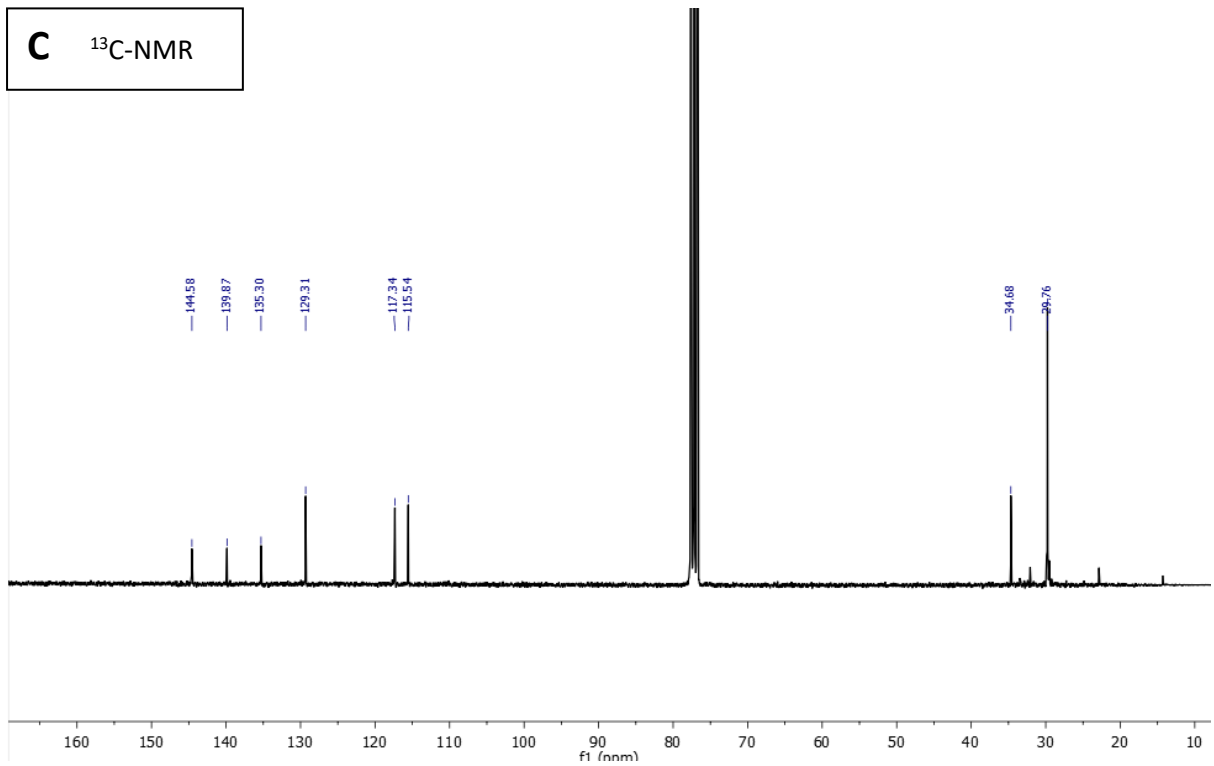

**D**  $^1\text{H-NMR}$

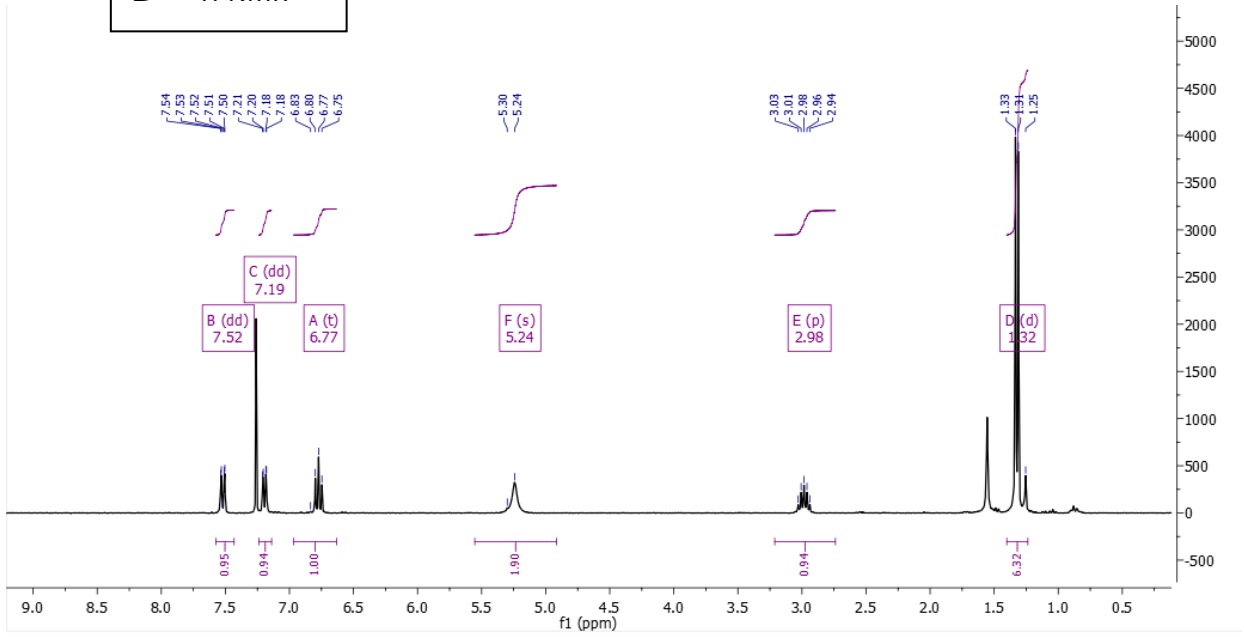

**D**  $^{13}\text{C-NMR}$

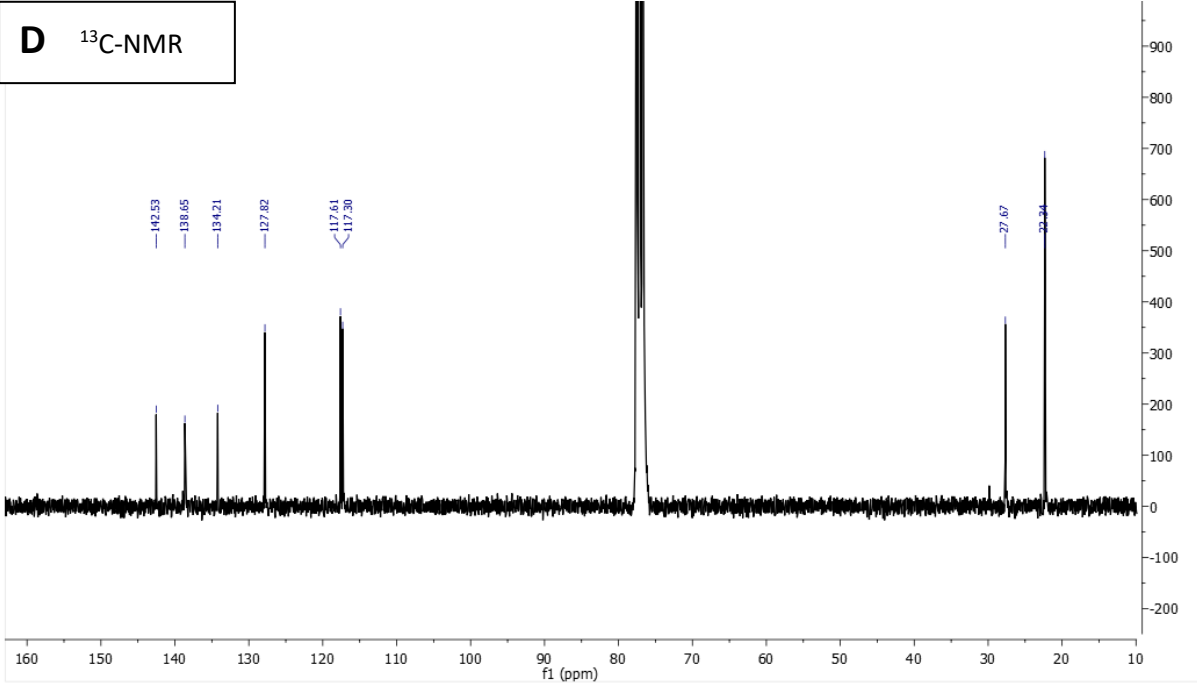



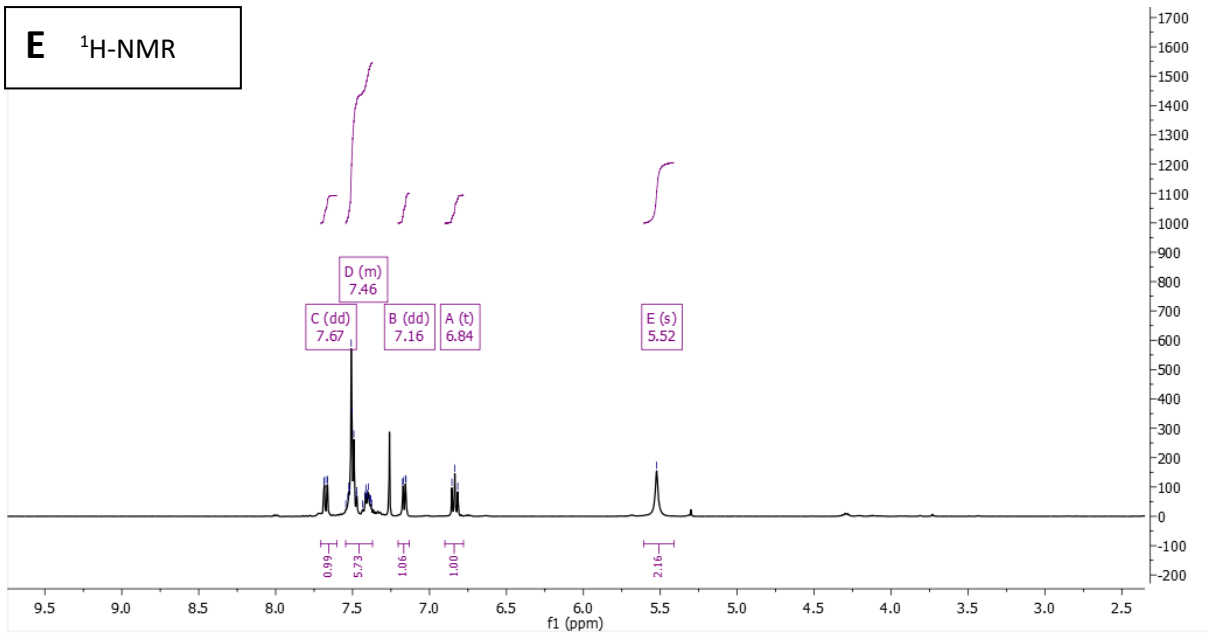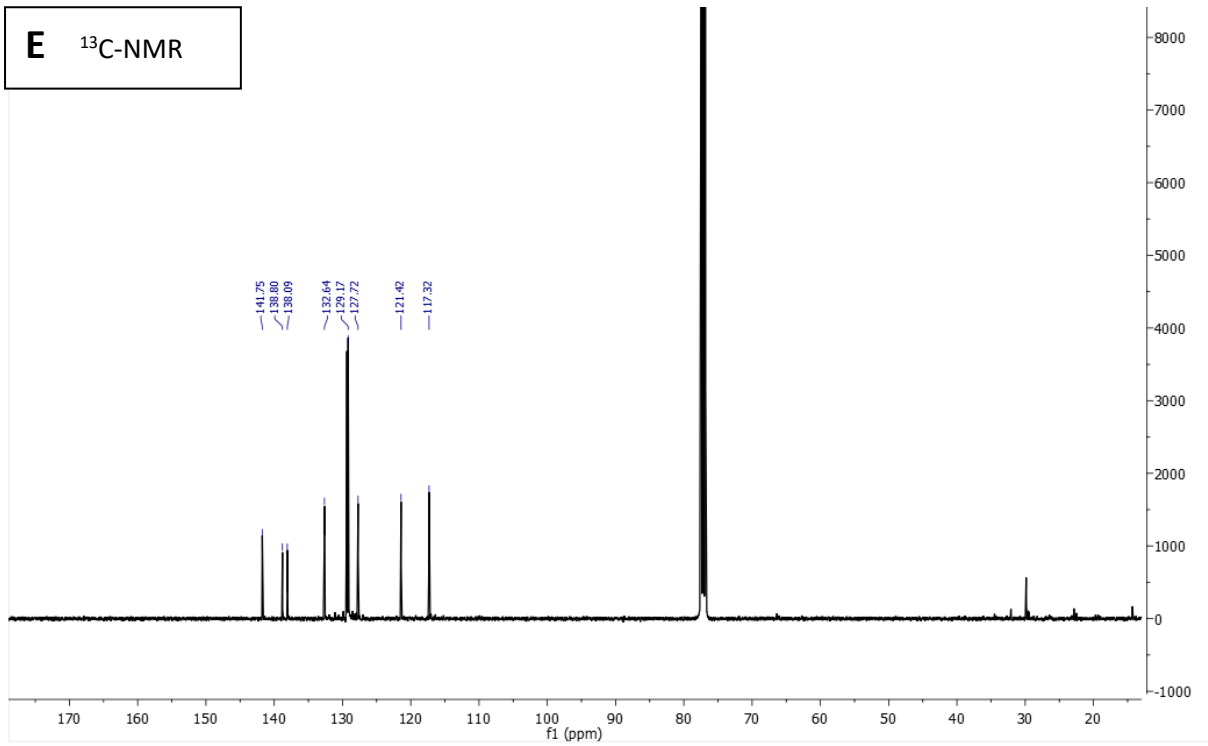

**F**  $^1\text{H-NMR}$

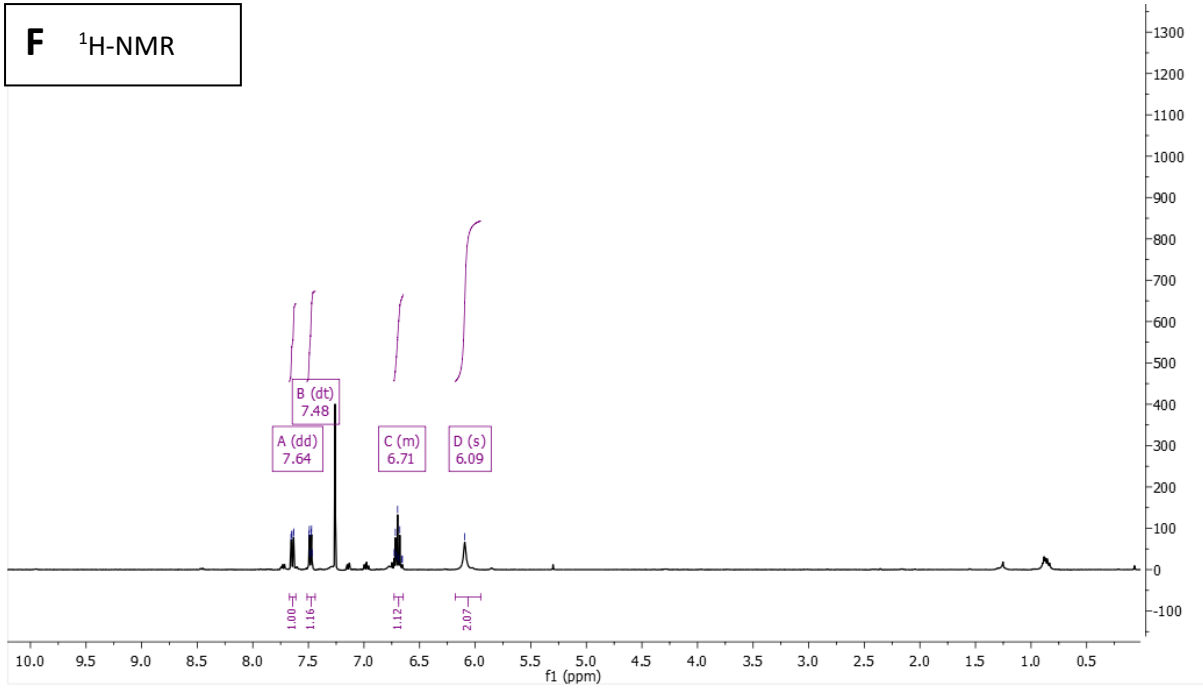

Supplement: molecules-23-01052-s001.pdf [file molecules-23-01052-s001.pdf]
